# Supplementary material for: Improvement of Ethanol Tolerance by Inactive Protoplast Fusion in Saccharomyces cerevisiae
Source: Hindawi journal article supplement (doi:10.1155/2020/1979318), 2020-01-01

# Fig. S1

Range 1: 1 to 613 [Graphics](#) ▼ Next Match ▲ Previous Match

| NW Score  | Identities                                                     | Gaps      | Strand    |
|-----------|----------------------------------------------------------------|-----------|-----------|
| 1197      | 610/614(99%)                                                   | 2/614(0%) | Plus/Plus |
| Query 1   | ATATCAAAAA-GCGGAGGAAAAGAAACCAACCGGGATTGCCTTAGTAAACGGCGAGTGA    |           | 57        |
| Sbjct 1   | GCATATCAAAAAAGCGGAGGAAAAGAAACCAACCGGGATTGCCTTAGTAAACGGCGAGTGA  |           | 60        |
| Query 58  | AGCGGC AAAAGCTCAAATTTGAAATCTGGTACCTTCGGTGCCCGAGTTGTAATTTGGAGA  |           | 117       |
| Sbjct 61  | AGCGGC AAAAGCTCAAATTTGAAATCTGGTACCTTCGGTGCCCGAGTTGTAATTTGGAGA  |           | 120       |
| Query 118 | GGGCAACTTTGGGGCCGTTCCCTTGCTATGTTCCCTTGGAAACAGGACGTCATAGAGGGTGA |           | 177       |
| Sbjct 121 | GGGCAACTTTGGGGCCGTTCCCTTGCTATGTTCCCTTGGAAACAGGACGTCATAGAGGGTGA |           | 180       |
| Query 178 | GAATCCCGTGTGGCGAGGAGTGC GGTTCTTTGTAAAAGTGCCTTCGAAGAGTCGAGTTGTT |           | 237       |
| Sbjct 181 | GAATCCCGTGTGGCGAGGAGTGC GGTTCTTTGTAAAAGTGCCTTCGAAGAGTCGAGTTGTT |           | 240       |
| Query 238 | TGGGAATGCAGCTCTAAGTGGGTGGTAAATTCATCTAAAGCTAAATATTGGCGAGAGAC    |           | 297       |
| Sbjct 241 | TGGGAATGCAGCTCTAAGTGGGTGGTAAATTCATCTAAAGCTAAATATTGGCGAGAGAC    |           | 300       |
| Query 298 | CGATAGCGAACAAAGTACAGTGATGGAAAGATGAAAAGAACTTTGAAAAGAGAGTGAAAAA  |           | 357       |
| Sbjct 301 | CGATAGCGAACAAAGTACAGTGATGGAAAGATGAAAAGAACTTTGAAAAGAGAGTGAAAAA  |           | 360       |
| Query 358 | GTACGTGAAATTGTTGAAAGGGAAGGGCATTGATCAGACATGGTGT TTTGTGCCCTCTG   |           | 417       |
| Sbjct 361 | GTACGTGAAATTGTTGAAAGGGAAGGGCATTGATCAGACATGGTGT TTTGTGCCCTCTG   |           | 420       |
| Query 418 | CTCCTTGTGGGTAGGGGAATCTCGCATTTCACTGGGCCAGCATCAGTTTTGGTGGCAGGA   |           | 477       |
| Sbjct 421 | CTCCTTGTGGGTAGGGGAATCTCGCATTTCACTGGGCCAGCATCAGTTTTGGTGGCAGGA   |           | 480       |
| Query 478 | TAAATCCATAGGAATGTAGCTTGCCTCGGTAAGTATTATAGCCTGTGGGAATACTGCCAG   |           | 537       |
| Sbjct 481 | TAAATCCATAGGAATGTAGCTTGCCTCGGTAAGTATTATAGCCTGTGGGAATACTGCCAG   |           | 540       |
| Query 538 | CTGGGACTGAGGACTGCGACGTAAGTCAAGGATGCTGGCATAATGGTTATATGCCGCCCG   |           | 597       |
| Sbjct 541 | CTGGGACTGAGGACTGCGACGTAAGTCAAGGATGCTGGCATAATGGTTATATGCCGCCCG   |           | 600       |
| Query 598 | TCTTGAAACACGGG 611                                             |           |           |
| Sbjct 601 | TCTTGAAACACGG 613                                              |           |           |

**Fig. S2**

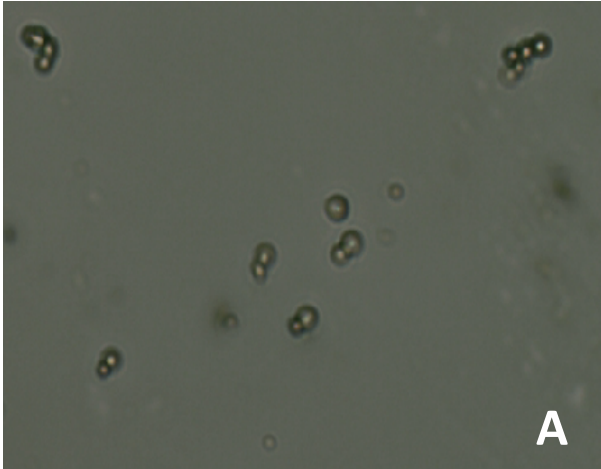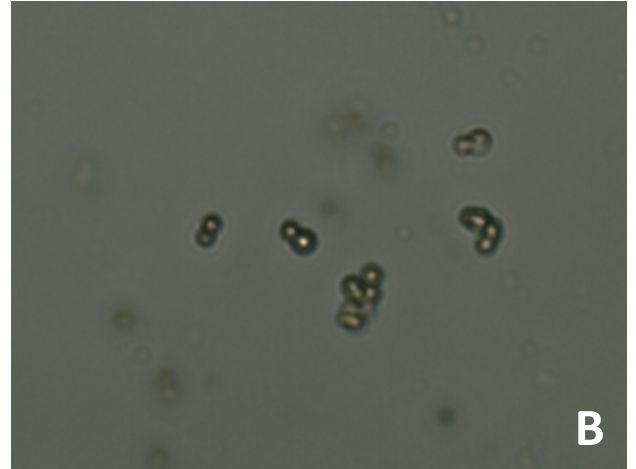

# Fig. S3

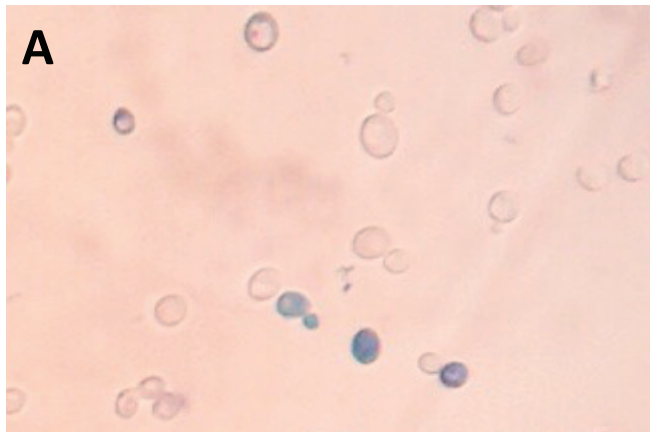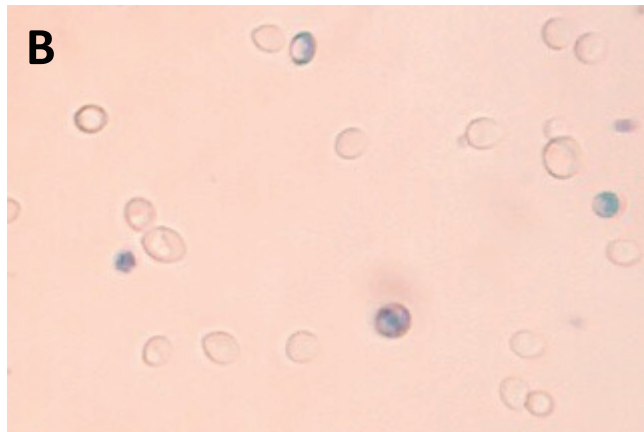

Supplement: f1 [file 1979318.f1.pdf]
